# Supplementary material for: The influence of ionic liquid on phase separation of poly(N-isopropylacrylamide) aqueous solution
Source: Royal Society of Chemistry journal article supplement (doi:10.1039/c2ra01349e), 2012-01-01
Supplement: c2ra01349e.pdf [file c2ra01349e.pdf]

*Supporting Information for*

# The Influence of ionic liquid on Phase Separation of Poly(N-isopropylacrylamide) Aqueous Solution

*Zhangwei Wang and Peiyi Wu\**

The State Key Laboratory of Molecular Engineering of Polymers and Department of Macromolecular  
Science and Laboratory of Advanced Materials, Fudan University, Shanghai 200433, People's Republic  
of China

---

\* corresponding author, email: [peiyiwu@fudan.edu.cn](mailto:peiyiwu@fudan.edu.cn)

### **DSC measurement**

The 5% (W/V) PNIPAM aqueous solutions with 0, 0.1, 0.4, 0.8, 1.0, 1.5, 2.0 mol/L [Bmim][BF<sub>4</sub>] were prepared before DSC measurement, respectively. The DSC was used to analyze the thermal properties of samples. Calibration for the temperature scale was performed using indium ( $T_m = 156.60$  °C and  $= 28.45$  J/g) as standard to ensure reliability of the data obtained, with an accuracy of 0.05 °C. All the experiments were performed in a nitrogen atmosphere. Each sample weighted about 10-15 mg and was sealed in aluminum pan. The measurement was carried out as following procedures: every sample was maintained at 20 °C for 5 min to ensure thermal equilibrium at the beginning, and then was heated to 45 °C at a rate of 10 °C/min.
